# Supplementary material
Source: Springer Nature journal article supplement (doi:10.1186/2190-4286-8-92)
Supplement: Additional file 1 [file 2190-4286-8-92-S1.pdf]

# Supporting Information

for

## **Bio-inspired micro-to-nanoporous polymers with tunable stiffness**

Julia Syurik<sup>1</sup>, Ruth Schwaiger<sup>2</sup>, Prerna Sudera<sup>1</sup>, Stephan Weyand<sup>2</sup>, Siegbert Johnsen<sup>3</sup>,  
Gabriele Wiegand<sup>3</sup> and Hendrik Hölscher\*<sup>1</sup>

Address: <sup>1</sup>Institute for Microstructure Technology, Karlsruhe Institute of Technology (KIT),  
Hermann-von-Helmholtz-Platz 1, 76344 Eggenstein-Leopoldshafen, Germany; <sup>2</sup>Institute for  
Applied Materials, Karlsruhe Institute of Technology (KIT), Hermann-von-Helmholtz-  
Platz 1, 76344 Eggenstein-Leopoldshafen, Germany and <sup>3</sup>Institute of Catalysis Research and  
Technology, Karlsruhe Institute of Technology (KIT), Hermann-von-Helmholtz-Platz 1,  
76344 Eggenstein-Leopoldshafen, Germany

Email: Hendrik Hölscher\* - [hendrik.hoelscher@kit.edu](mailto:hendrik.hoelscher@kit.edu)

\* Corresponding author

## **Additional experimental data**

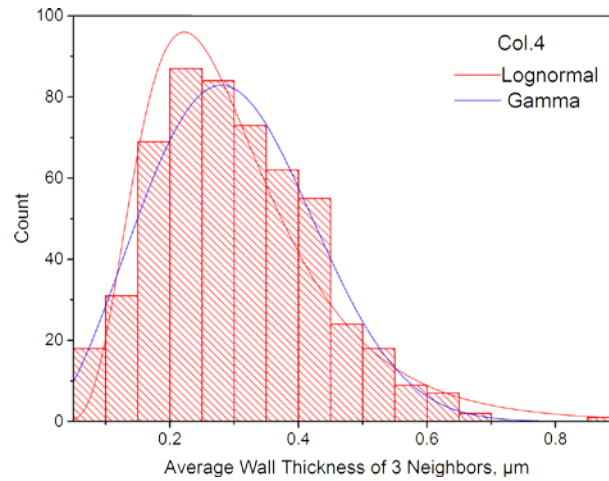

**Figure 1:** Distribution of the average distance between pores for the indentation column four. The data is fitted with a log-normal distribution (red solid line), which does not satisfy a Kolmogorov–Smirnov test at 5% level with a P-value of 0.03, and with Gamma distribution (blue solid line), which satisfies the Kolmogorov–Smirnov test at 5% level with a P-value of 0.20. In order to have comparable values for all indentation columns, the log-normal distribution was used in the study.
